# Supplementary material
Source: publisher figshare collection journal article supplement (https://frontiersin.figshare.com/ndownloader/files/14892491)
Supplement: Supplementary file [file 14892491]

## *Supplementary Material*

# **Coexistence of Microbial Species in Structured Communities by Forming a Hawk-dove Game Like Interactive Relationship**

**Kelei Zhao<sup>1,\*</sup>, Jing Li<sup>1</sup>, Ting Huang<sup>1</sup>, Yang Yuan<sup>1</sup>, Jiafu Lin<sup>1</sup>, Bisong Yue<sup>2</sup>, Xinrong Wang<sup>1</sup>, and Yiwen Chu<sup>1,\*</sup>**

<sup>1</sup> Antibiotics Research and Re-evaluation Key Laboratory of Sichuan Province, Sichuan Industrial Institute of Antibiotics, Chengdu University, Chengdu, China

<sup>2</sup> Key Laboratory of Bio-resources and Eco-environment (Ministry of Education), College of Life Sciences, Sichuan University, Chengdu, China

**\* Correspondence:**

Kelei Zhao, Email: zkl5228@163.com; and Yiwen Chu, Email: chuyiwen@cdu.edu.cn.

## Supplementary Figures

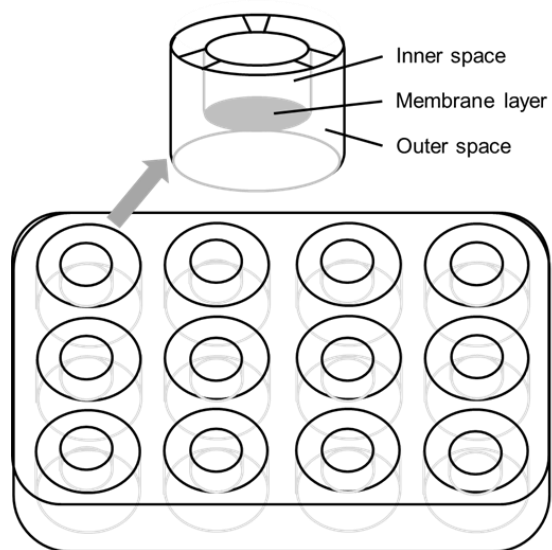

**Supplementary Figure 1.** Sketch of 12-well polystyrene plate equipped with an inner well containing a 0.4  $\mu\text{m}$  permeable polycarbonate membrane in the bottom of the inner well.

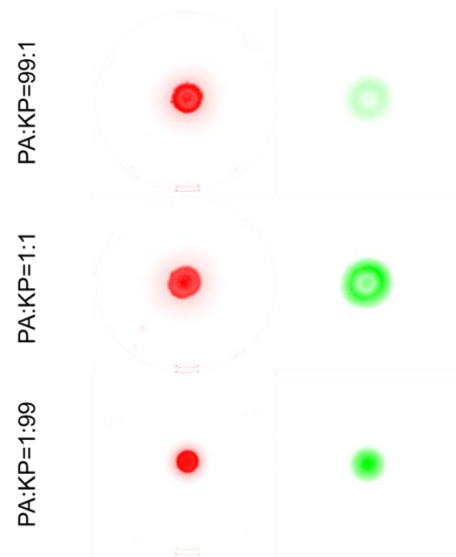

**Supplementary Figure 2.** Fluorescence detection of cocultured *P. aeruginosa* and *K. pneumoniae* from different initial ratios on LB plates for 4 days. Red color, *P. aeruginosa*. Green color, *K. pneumoniae*.

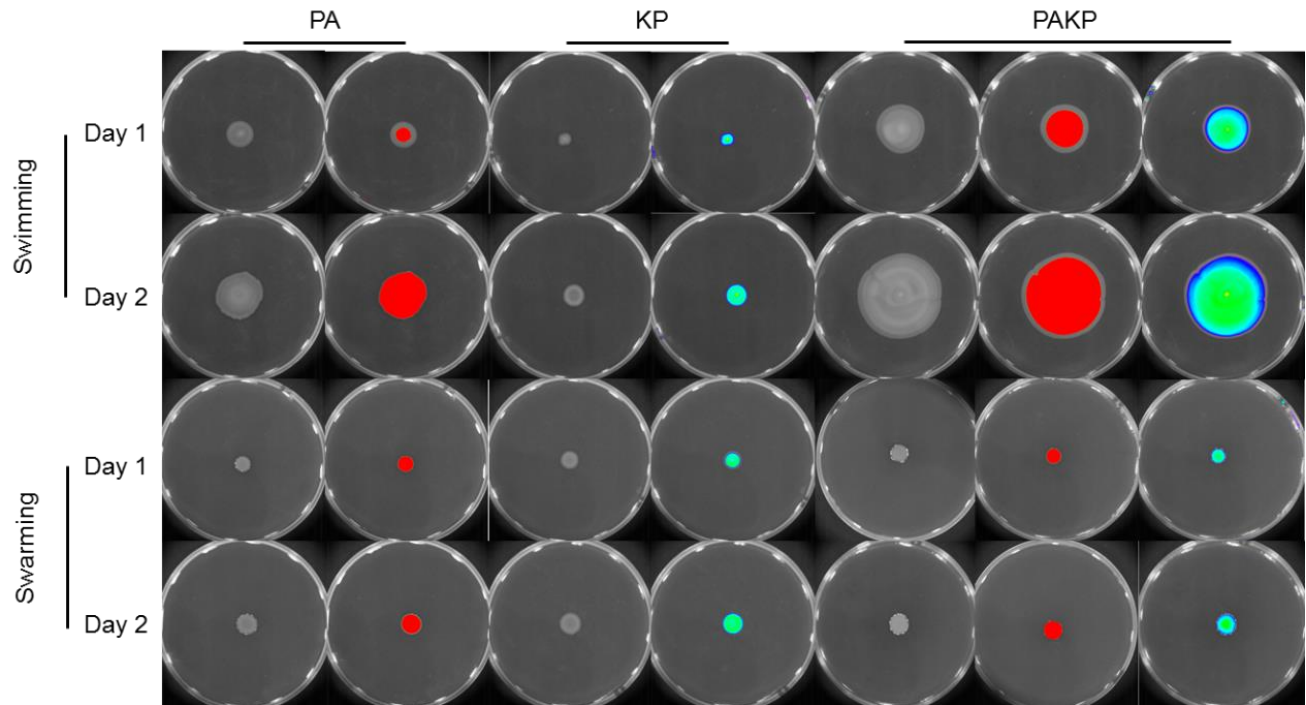

**Supplementary Figure 3.** Motilities of *P. aeruginosa* (PA) and *K. pneumoniae* (KP) on under mono- or co-culture conditions. Swimming abilities of PA, KP, or 1:1 mixture of them (PAKP) were determined by stabbing (not reach the bottom) the inocula into LB plates containing 0.3% of agar. Swarming abilities were determined by inoculating 2  $\mu$ l of inocula on the surface of LB plates containing 0.6% of agar. Growth status of PA and KP were measured after 1 and 2 days by fluorescence detection. Red color, *P. aeruginosa*. Green color, *K. pneumoniae*.

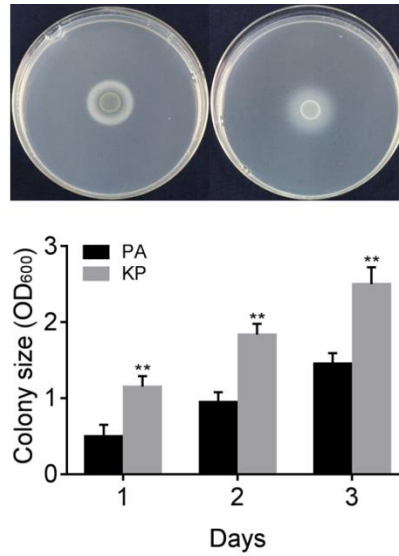

**Supplementary Figure 4.** Growth status of *P. aeruginosa* (PA) and *K. pneumoniae* (KP) on M9-milk plates. Upper left, *P. aeruginosa*. Upper right, *K. pneumoniae*. Mean values of standard deviation ( $n = 3$ ) of each column were compared to *P. aeruginosa* at each time-point by using two-tailed unpaired  $t$ -test. \*\*,  $P < 0.01$ .

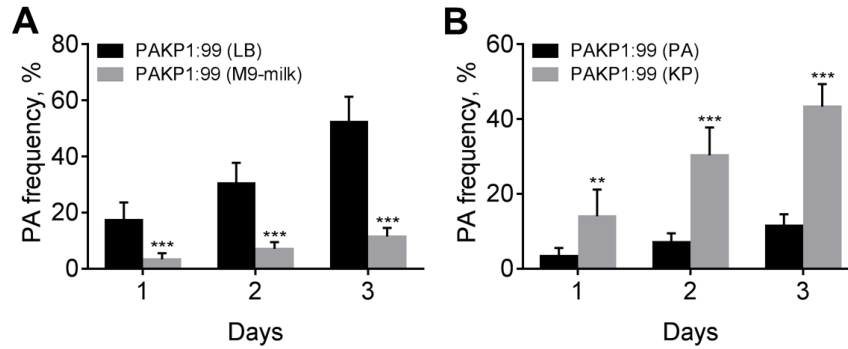

**Supplementary Figure 5. (A)** Proportional changes of *P. aeruginosa* cocultured with *K. pneumoniae* from an initial ratio of 1:99 on different solid media. Mean values of standard deviation ( $n = 6$ ) of each column were compared to LB plates at each time-point by using two-tailed unpaired  $t$ -test. \*\*\*,  $P < 0.001$ . **(B)** Proportional changes of *P. aeruginosa* or *K. pneumoniae* cocultured from an initial ratio of 1:99 with each other on M9-milk plates. Mean values of standard deviation ( $n = 6$ ) of each column were compared to *P. aeruginosa* at each time-point by using two-tailed unpaired  $t$ -test. \*\*,  $P < 0.01$ , \*\*\*,  $P < 0.001$ .

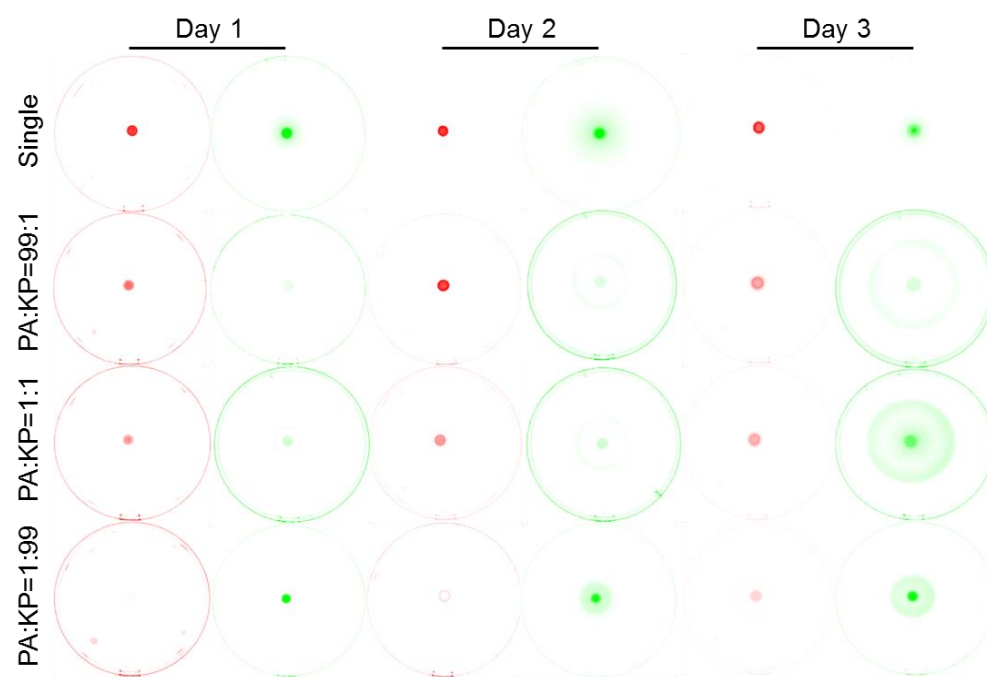

**Supplementary Figure 6.** Fluorescence detection of singly cultured *P. aeruginosa* or *K. pneumoniae* (first row) or coculture of them from different initial ratios on M9-milk plates. Red color, *P. aeruginosa*. Green color, *K. pneumoniae*.

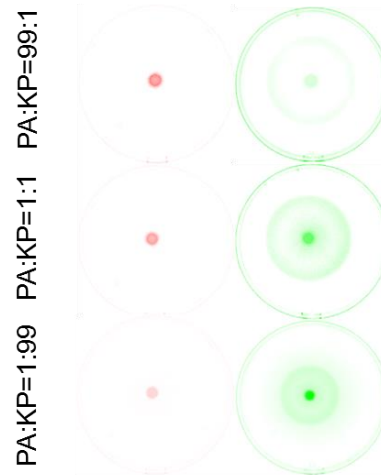

**Supplementary Figure 7.** Fluorescence detection of *P. aeruginosa* and *K. pneumoniae* cocultured from initial ratio of 1:1 on M9-milk plates for 4 days. Red color, *P. aeruginosa*. Green color, *K. pneumoniae*.



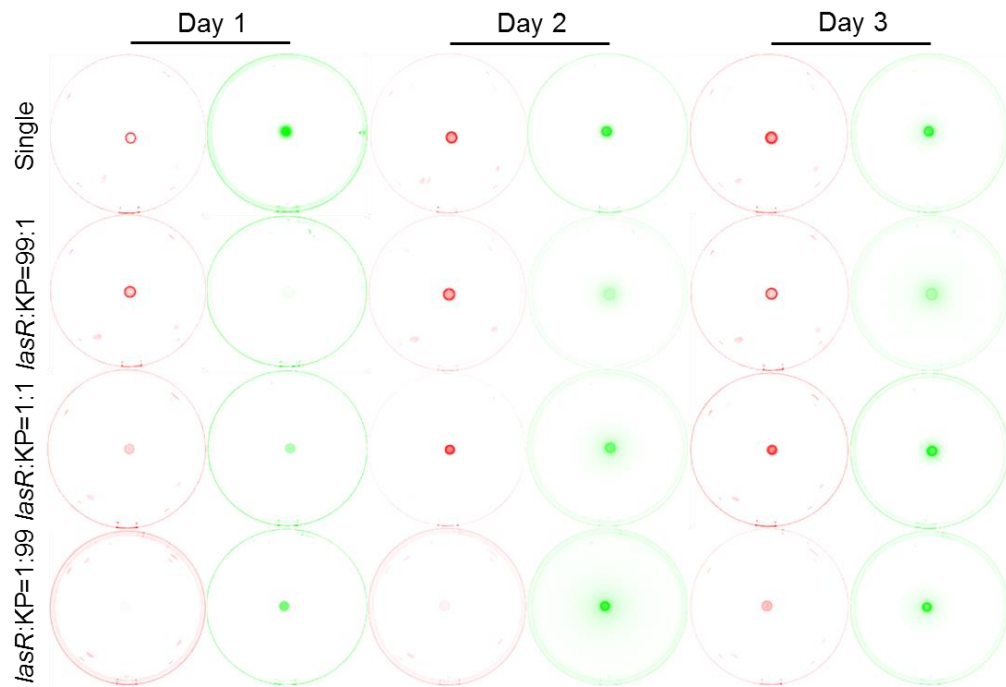

**Supplementary Figure 8.** Fluorescence detection of singly cultured *P. aeruginosa lasR* mutant (*lasR*) or *K. pneumoniae* (first row) or coculture of them from different initial ratios on M9-milk plates. Red color, *P. aeruginosa lasR* mutant. Green color, *K. pneumoniae*.

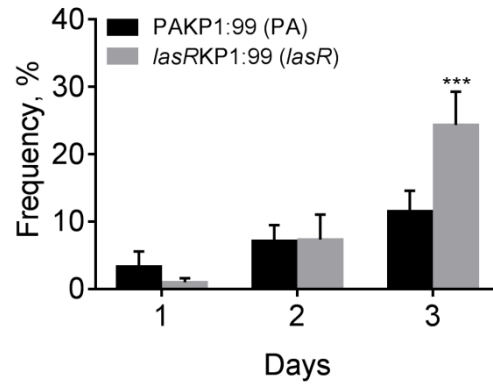

**Supplementary Figure 9.** Proportional changes of *P. aeruginosa* or *P. aeruginosa lasR* mutant cocultured with *K. pneumoniae* from an initial ratio of 1:99 on M9-milk plates. Mean values of standard deviation ( $n = 6$ ) of each column were compared to *P. aeruginosa* at each time-point by using two-tailed unpaired *t*-test. \*\*\*,  $P < 0.001$ .

## **Supplementary Datasets**

**Supplementary Dataset 1.** Significantly differentially expressed genes of *P. aeruginosa* when statically cocultured with *K. pneumoniae* on LB agar for 3 days.

**Supplementary Dataset 2.** Significantly differentially expressed genes of *K. pneumoniae* when statically cocultured with *P. aeruginosa* on LB agar for 3 days.

**Supplementary Dataset 3.** Significantly differentially expressed genes of *P. aeruginosa* when statically cocultured with *K. pneumoniae* in LB broth for 3 days.

**Supplementary Dataset 4.** Significantly differentially expressed genes of *K. pneumoniae* when statically cocultured with *P. aeruginosa* in LB broth for 3 days.

**Supplementary Dataset 5.** Significantly differentially expressed genes of *P. aeruginosa* cultured in the outer well compared to normal pure culture.

**Supplementary Dataset 6.** Significantly differentially expressed genes of *K. pneumoniae* cultured in the outer well compared to normal pure culture.
